# Supplementary material for: Heat-dissipation regulation for improving the thermal stability and efficiency of planar perovskite solar cells
Source: Royal Society of Chemistry journal article supplement (doi:10.1039/d5tc00487j), 2025-01-01
Supplement: d5tc00487j1.pdf [file d5tc00487j1.pdf]

## Supporting Information

### Heat Dissipation Regulation for Improved Thermal Stability and Efficiency of Planar Perovskite Solar Cells

Jingyao Feng <sup>a†</sup>, Wenda Shi <sup>b†</sup>, Xin Wang <sup>a\*</sup>, Hui Wang <sup>c</sup>, Yanan Wang <sup>d</sup>, Hongwei Zhang<sup>a</sup>, Lina Wang<sup>a</sup>, Yuchen Song<sup>a</sup>, Ziyu Liu <sup>b</sup>, Pei Liu <sup>b</sup>, Xueling Zhao <sup>a</sup>, Wenqin Li <sup>a</sup>, Lifei Chen <sup>a\*</sup>, Xiaoming Zhao <sup>c\*</sup>

#### Affiliations:

<sup>a</sup> School of Energy and Materials, Shanghai Engineering Research Center of Advanced Thermal Functional Materials, Shanghai Thermophysical Properties Big Data Professional Technical Service Platform, Shanghai Polytechnic University, Shanghai 201209, China.

<sup>b</sup> School of Chemistry and Chemical Engineering, Northwestern Polytechnical University, Xi'an, P. R. China.

<sup>c</sup> Shanghai Research Institute of Materials Co. Ltd. Shanghai, 200437, China.

<sup>d</sup> College of Mathematics and Physics, Shanghai University of Electric Power, Shanghai, 201306, China.

<sup>e</sup> Institute for Frontier Science, Nanjing University of Aeronautics and Astronautics, Nanjing 210016, China.

E-mail: [xinwang@sspu.edu.cn](mailto:xinwang@sspu.edu.cn), [lfchen@sspu.edu.cn](mailto:lfchen@sspu.edu.cn), [xiaoming.zhao@nuaa.edu.cn](mailto:xiaoming.zhao@nuaa.edu.cn)

<sup>†</sup>The authors contributed equally to this work.

## **1. Experiment section**

### **1.1 Materials.**

All the chemicals were purchased from commercial vendors without further purification. SnO<sub>2</sub> colloid precursor (tin (iv) oxide, 15% in H<sub>2</sub>O colloidal dispersion) was purchased from Alfa Aesar. Dimethylformamide (DMF), Dimethyl sulfoxide (DMSO), Acetonitrile (AN), Isopropanol (IPA), and Chlorobenzene (CB) were purchased from Sigma-Aldrich; Lead iodine (PbI<sub>2</sub>), Formamidinium iodide (FAI), Methylammonium iodide (MAI), Methylammonium chloride (MAcI), 2,2',7,7'-Tetrakis [N, N-di(4-methoxyphenyl)amino]-9,9'-spirobifluorene (Spiro-OMe TAD) were all purchased from Xi'an Yuri Solar Co., Ltd.

### **1.2 Synthesis of 2D g-C<sub>3</sub>N<sub>4</sub>:**

The carbon nitride material g-C<sub>3</sub>N<sub>4</sub> was prepared using the heat shrinkage polymerization method, which uses melamine as the raw material. Weight 10g melamine in a porcelain ark and put into a tube furnace, nitrogen gas is introduced to heat up to 550 °C at 2.5 °C/min, and holding at 550 °C for 4 hours, the reaction product bulk g-C<sub>3</sub>N<sub>4</sub> is obtained after natural cooling down to room temperature and grinding in a mortar. Then, the bulk g-C<sub>3</sub>N<sub>4</sub> powder was put into the muffle furnace, heated to 500 °C at 5 °C/min, kept at 500 °C for 2 hours, and then naturally cooled to room temperature for grinding to obtain the finally g-C<sub>3</sub>N<sub>4</sub> nanosheets.

### **1.3 Precursor Preparation and Device Fabrication**

Firstly, g-C<sub>3</sub>N<sub>4</sub> (0.1-0.5 mg/ml) was added to deionized water and DMF, respectively, and sonicated for 10 h, after which it was filtered through a filter head with a filtration diameter of 0.45 μm to obtain the precursor solution, which was used to replace the original solvent. Next, SnO<sub>2</sub> nanoparticles were diluted with deionized water to achieve a nanoparticle dispersion with a concentration of 2.67%. For comparative purposes, the markers use pure solvents without adding g-C<sub>3</sub>N<sub>4</sub>. ITO glass was cleaned sequentially with detergent, deionized water, acetone, and isopropanol (IPA). Before use, the ITO

was cleaned with ultraviolet ozone for 10 minutes. Then, the substrate was spin-coated with a thin layer of SnO<sub>2</sub> nanoparticle film at 4,000 rpm. for 30 s and annealed in ambient air at 150 °C for 30min. It is better to clean the substrate with ultraviolet ozone for 10 minutes to improve the surface wetting. After that, 1.5M of PbI<sub>2</sub> in DMF: DMSO (9:1) solvent was spin-coated onto SnO<sub>2</sub> at 1,500 rpm. for 30 s, then annealed at 70 °C for 1min, and then cooled to room temperature. For FAMAPbI<sub>3</sub> perovskite film deposition, a solution of FAI: MAI: MACl (90mg:6.39mg:9mg in 1ml IPA) was spin-coated onto the PbI<sub>2</sub> at a spin rate of 2,000 rpm. for 30s, followed by thermal annealing at 150 °C for 15min in ambient air conditions (30–40% humidity). Then the hole transporting layer was deposited on top of the perovskite layer at a spin rate of 3,000 rpm. for 30s using 2,2',7,7'-Tetrakis[N, N-di(4-methoxyphenyl)amino]-9,9'-spirobifluorene (Spiro-OMeTAD) solution, which consisted of 72.3mg Spiro-OMeTAD, 17.5μl bis(trifluoromethane) sulfonimide lithium salt (Li-TFSI) stock solution (520mg Li-TFSI in 1ml acetonitrile), 28.8μl 4-tertbutylpyridine and 1ml chlorobenzene. Finally, 100nm of Ag film was thermally evaporated as a counter electrode using a shadow mask. When measuring the device, a 0.08 cm<sup>2</sup> non-reflective mask was used to define the accurate active cell area.

#### 1.4 Characteristics

X-ray diffraction (XRD) measurements are carried out on TCPUI K780 over the range of  $2\theta = 5\text{--}55.0^\circ$  with a step size of  $0.01^\circ$  and 0.4s per step. UV-Vis-NIR absorption spectra are recorded on Cary 5000 UV-Visible-NIR spectrophotometer. The sample films are deposited on an ITO substrate. Steady-state photoluminescence (PL) and time-resolved photoluminescence (TRPL) are measured using a Spectrofluorometer FS5 (Edinburgh et al.) with excitation at 475 nm. The morphology of perovskite thin films and cross-sectional SEM images were measured using a cold field-emission scanning electron microscope (Hitachi S4800). The thermal images were taken using a FLIR infrared camera (FLIR T540, USA). The thermal diffusivity was measured by LFA 467 HT Hyperflash (Netzsch Germany). The electrochemical impedance spectroscopy (EIS) measurements were determined on an electrochemical workstation RHA-

CHI800D. The current density–voltage ( $J$ – $V$ ) characteristics of the devices were measured using a Keithley 2400 Source Meter under standard AM1.5 G illumination (SolarIV-300A; Zolix, China), and the light intensity was calibrated using a standard silicon reference cell. The  $J$ – $V$  curves were measured by forward scan (-0.1 to 1.20 V) and reverse scan (1.20 to -0.1 V) at a scanning rate of 100 mV/s (voltage step: 10 mV, delay time: 1 ms).

### 1.5 Trap density measurement.

The trap-state density  $N_t$  of perovskite films with different ETLs was measured by space-charge-limited current (SCLC) method using a diode configuration of ITO/SnO<sub>2</sub>/Perovskite/PC<sub>61</sub>BM/Ag for electron by taking the dark current density in the range of 0–4 V and fitting the results to a space-charge-limited form, where the  $N_t$  was calculated according to the equation:

$$N_t = \frac{2V_{TFL}\epsilon_0\epsilon_r}{eL^2}$$

Where  $V_{TFL}$  is the trap-filled limit voltage,  $\epsilon_0$  is the vacuum permittivity ( $\epsilon_0 = 8.8 \times 10^{-12}$  F m<sup>-1</sup>), and  $e$  is the electron charge ( $e = 1.6 \times 10^{-19}$  C),  $L$  is the thickness of the perovskite film ( $L = 800$  nm), and the adopted  $\epsilon_r$  is 62.23.

### 1.6 Electron mobility.

We have measured electron mobility using different ETLs in the same device structure to gain insights into the charge transport. Specifically, the electron-only device was designed and fabricated using an ITO/ETL/Ag structure. In this analysis, we assumed that the current is only related to electrons. When the effects of diffusion and the electric field are neglected, the SCLC can determine the current density. The devices' dark  $J$ – $V$  curves were performed on a Keithley 2400 source at ambient conditions. The electron mobility ( $\mu_e$ ) is extracted by fitting the  $J$ – $V$  curves using the Mott–Gurney law:

$$\mu_e = \frac{8JL^3}{9\varepsilon_0\varepsilon_r(V_{app} - V_r - V_{bi})^2}$$

Where  $J$  is the current density,  $L$  is the thickness of different ETLs,  $\varepsilon_0$  the vacuum permittivity,  $\varepsilon_r$  the dielectric permittivity of various ETL,  $V_{app}$  is the applied voltage,  $V_r$  is the voltage loss due to radiative recombination, and  $V_{bi}$  the built-in voltage owing to the different work function between the anode and cathode.

### 1.7 Thermal diffusivity relates

Thermal diffusivity relates to the homogeneous temperature performance of the thermal conductivity process of the material; this parameter is crucial for the analysis of the unsteady thermal conductivity process; the thermal diffusivity definition equation:

$$\alpha = \frac{k}{\rho C}$$

where  $k$  is the thermal conductivity,  $\rho$  is the density, and  $C$  is the specific heat capacity.

## 2. Supplementary figures

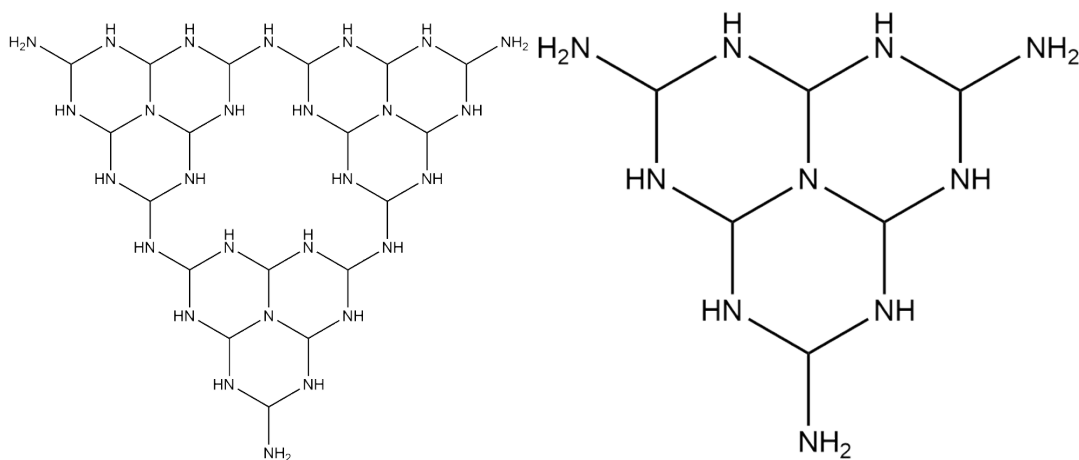

**Figure S1.** Schematic diagram of  $\text{g-C}_3\text{N}_4$  structure, with heptazine ring structure (left) and triazine ring structure (right).

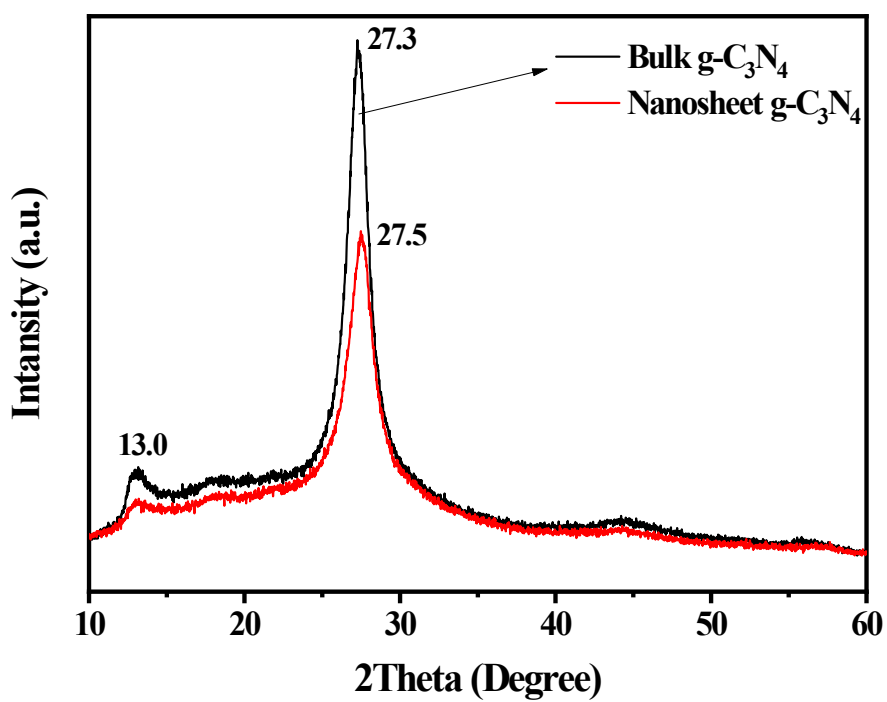

**Figure S2.** The XRD profile of  $\text{g-C}_3\text{N}_4$ .

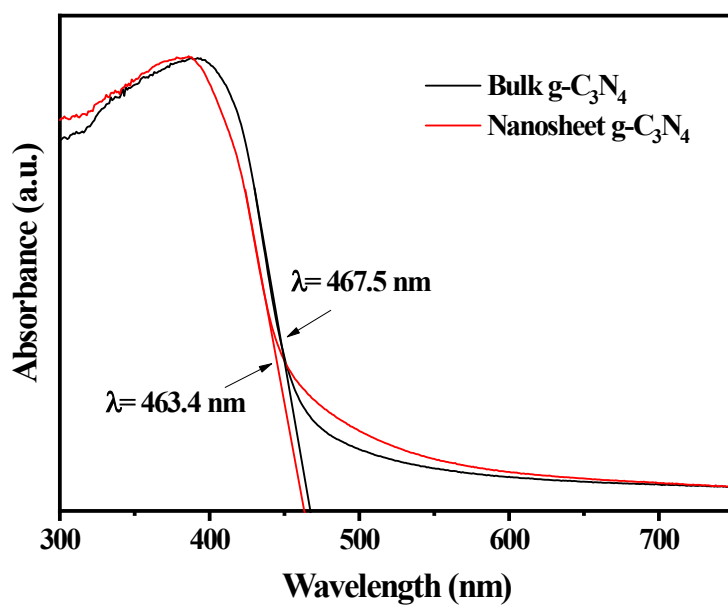

**Figure S3.** The UV-visible absorption profile of g-C<sub>3</sub>N<sub>4</sub>.

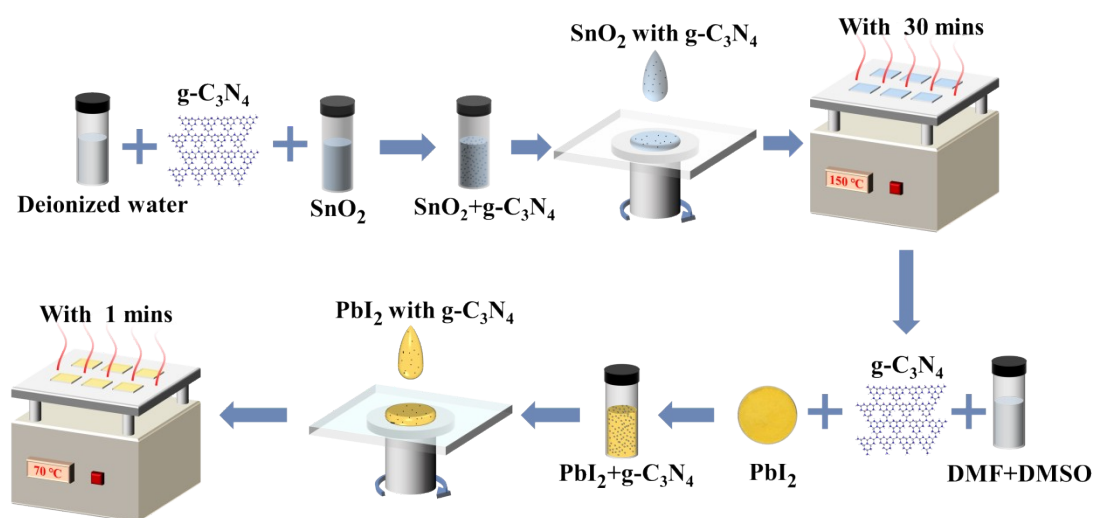

**Figure S4.** Schematic diagram of the deposition for SnO<sub>2</sub> with g-C<sub>3</sub>N<sub>4</sub> layer and perovskite with g-C<sub>3</sub>N<sub>4</sub> layer.

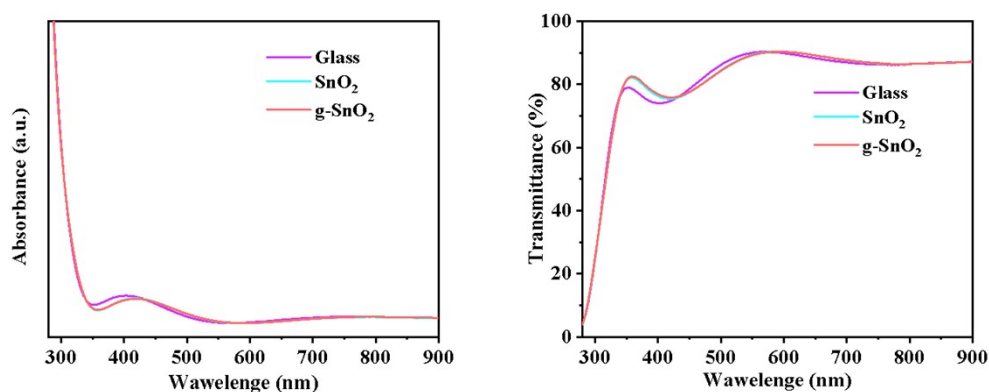

**Figure S5.** UV-vis absorption spectra  $\text{SnO}_2$  and  $\text{g-SnO}_2$  films spin-coated on the ITO substrates.

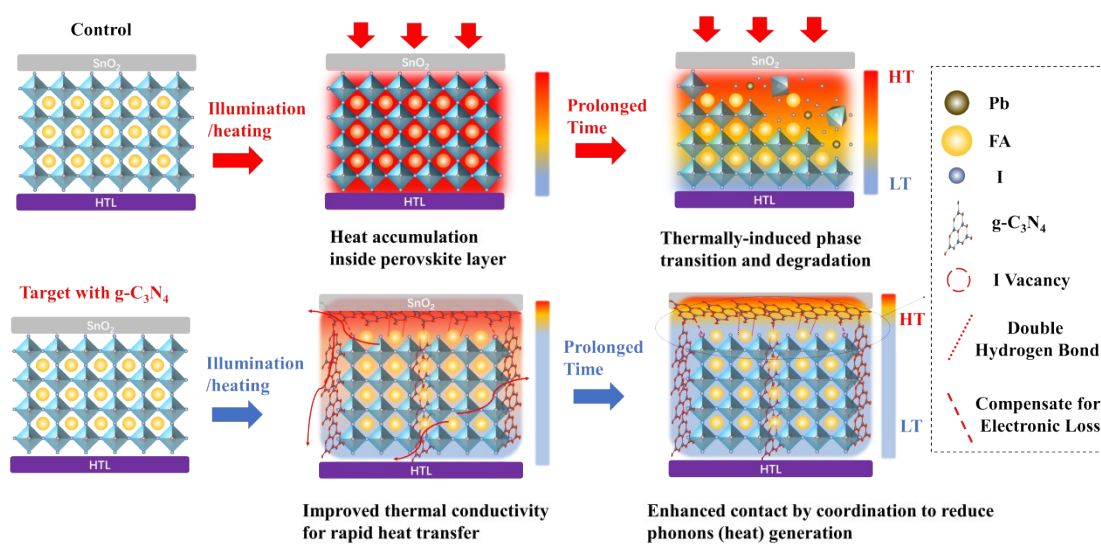

**Figure S6.** Diagram of the heat dissipation mechanism of  $\text{g-C}_3\text{N}_4$  as a heat transport channel



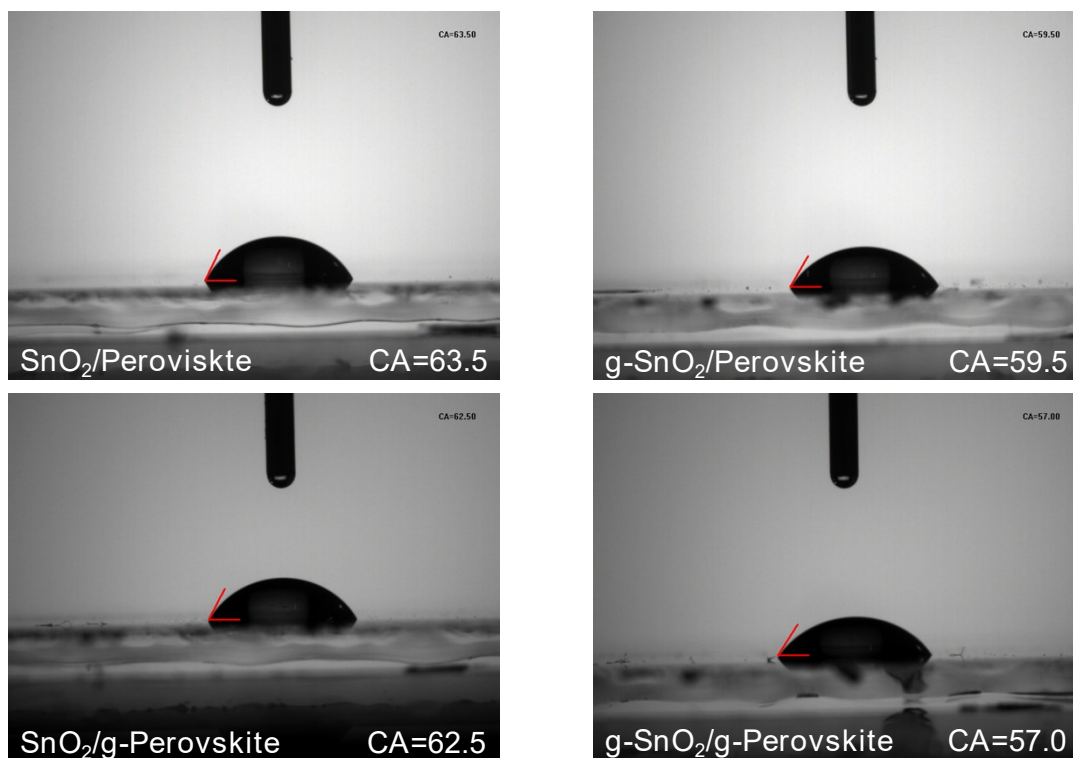

**Figure S7.** Water droplet contact angles on surfaces, including SnO<sub>2</sub>/perovskite, g-SnO<sub>2</sub>/perovskite, SnO<sub>2</sub>/g-perovskite, and g-SnO<sub>2</sub>/g-perovskite.

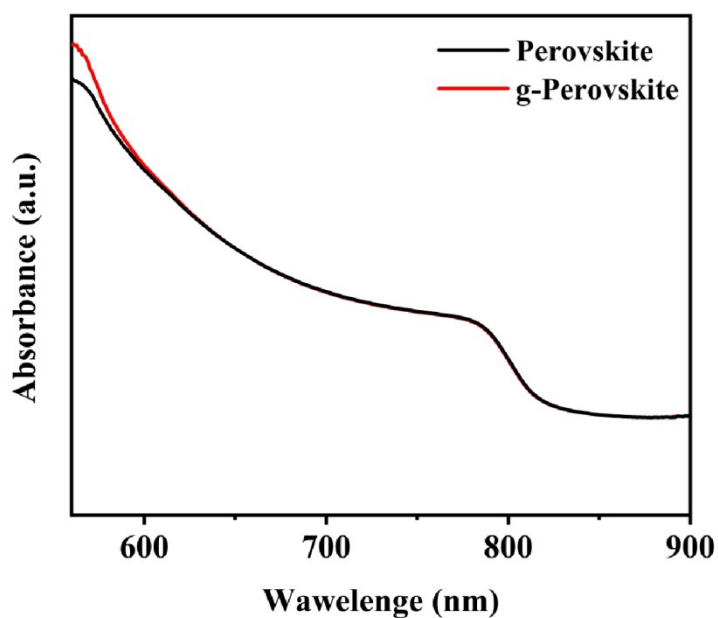

**Figure S8.** UV-vis absorption spectra Perovskite and g-Perovskite films spin-coated on the ITO substrates.

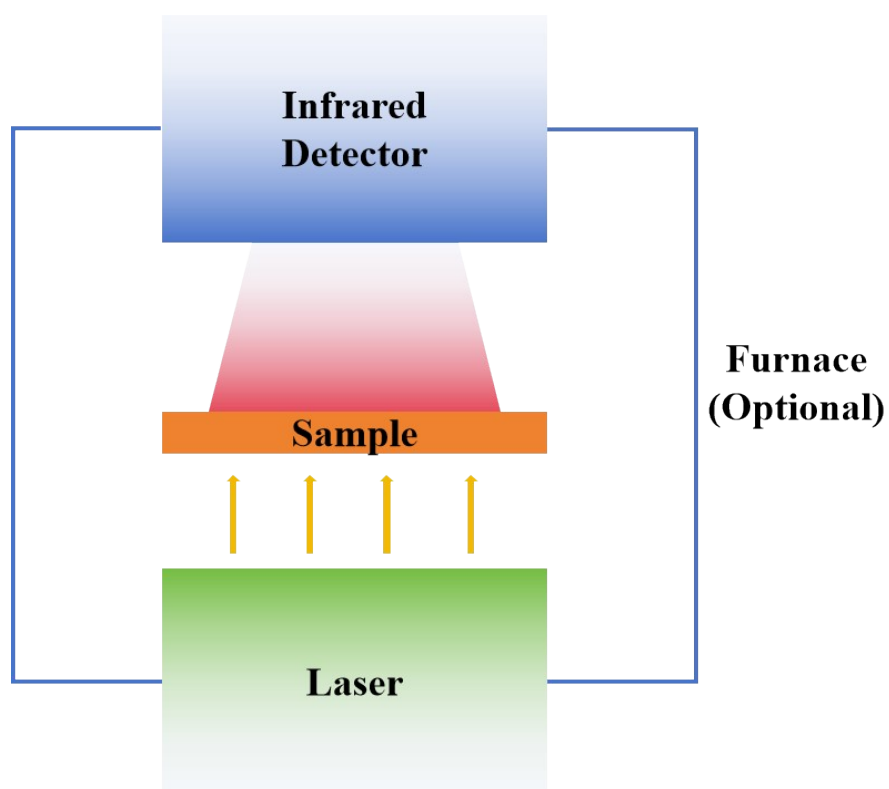

**Figure S9.** Schematic diagram of the laser thermal conductivity meter.

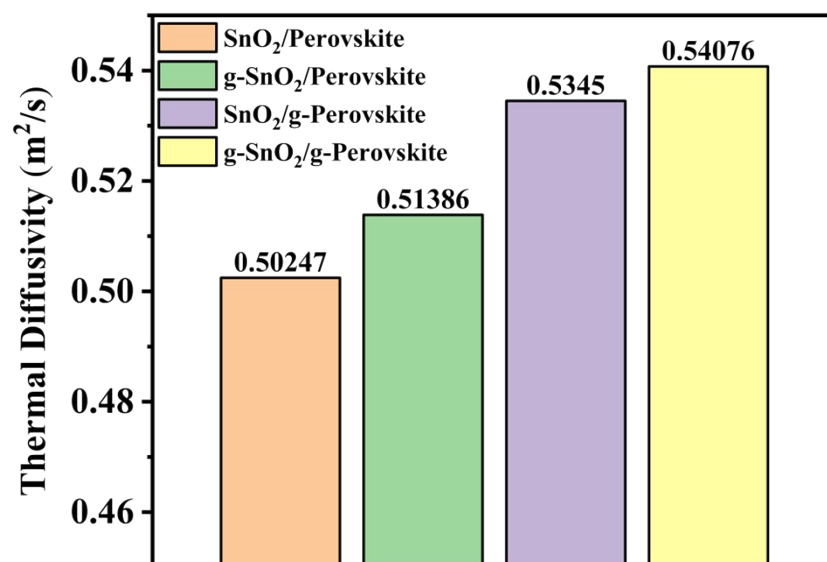

**Figure S10.** Thermal diffusion coefficients under 50 °C of various films.

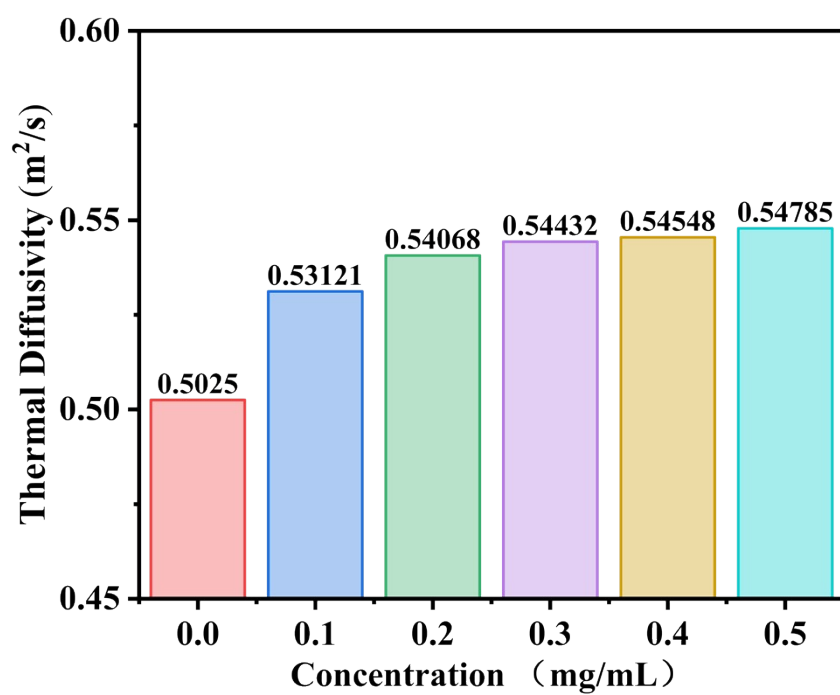

**Figure S11.** Thermal diffusion coefficients under 50°C of various concentration.

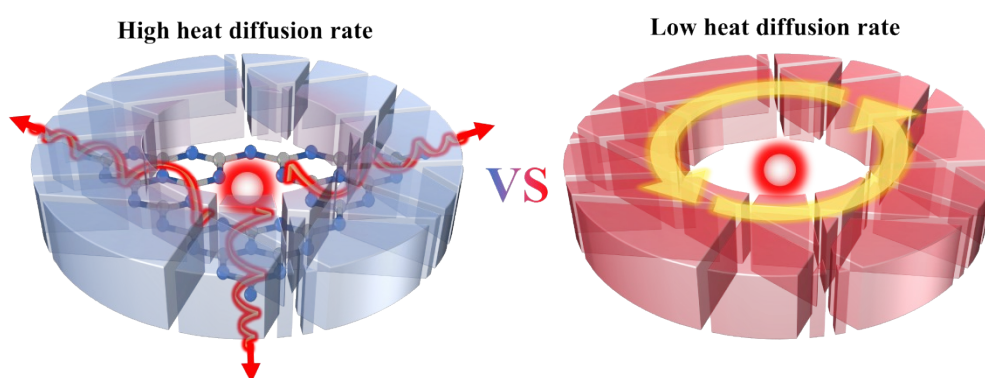

**Figure S12.** Different heat diffusion rates on PSCs with and without  $\text{g-C}_3\text{N}_4$  assistance.

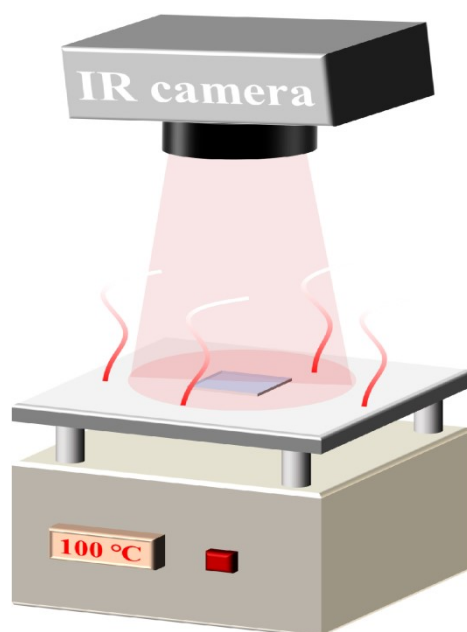

**Figure S13.** A Schematic representation of the IR thermal images test.

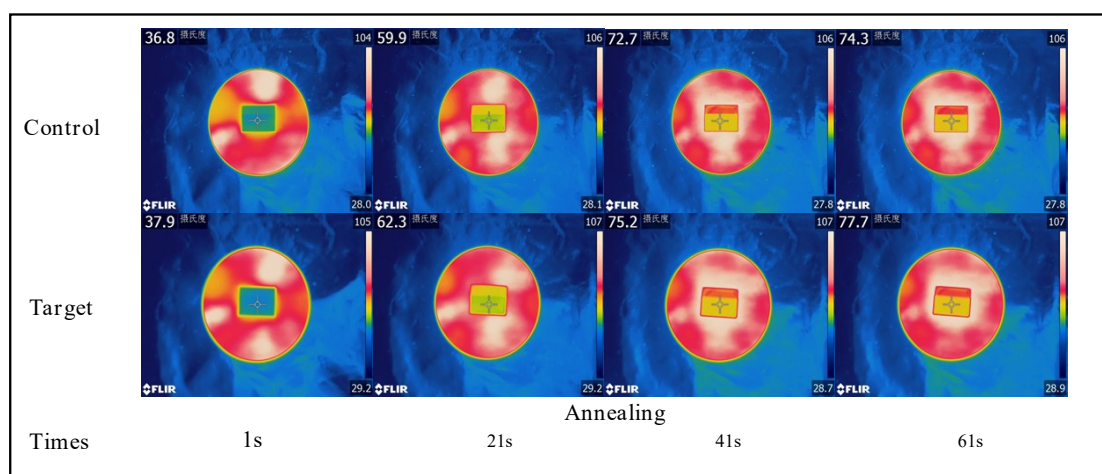

**Figure S14.** IR thermal images of different films under 100°C over time. All samples were prepared on the glass substrate.

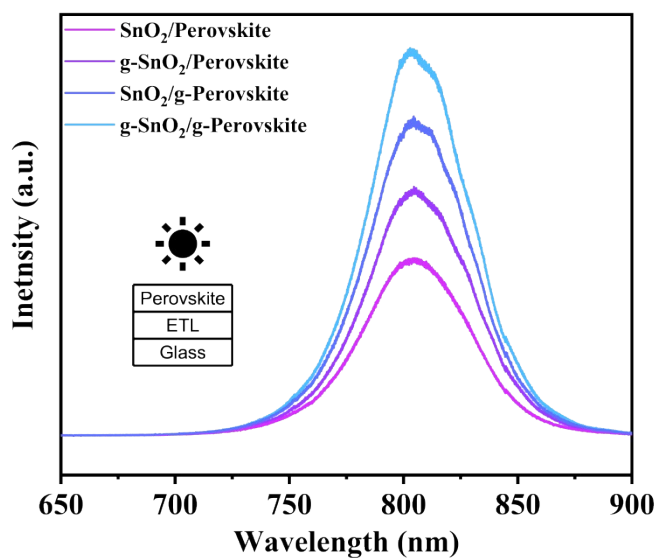

**Figure S15.** PL spectra of perovskite films, including  $\text{SnO}_2/\text{Perovskite}$ ,  $\text{g-SnO}_2/\text{Perovskite}$ ,  $\text{SnO}_2/\text{g-Perovskite}$ , and  $\text{g-SnO}_2/\text{g-Perovskite}$ .

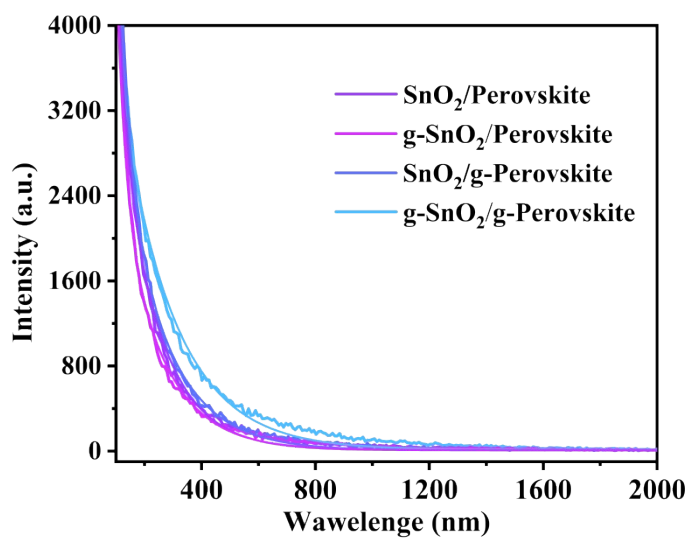

**Figure S16.** TRPL spectra of perovskite films, including  $\text{SnO}_2/\text{Perovskite}$ ,  $\text{g-SnO}_2/\text{Perovskite}$ ,  $\text{SnO}_2/\text{g-Perovskite}$ , and  $\text{g-SnO}_2/\text{g-Perovskite}$ .

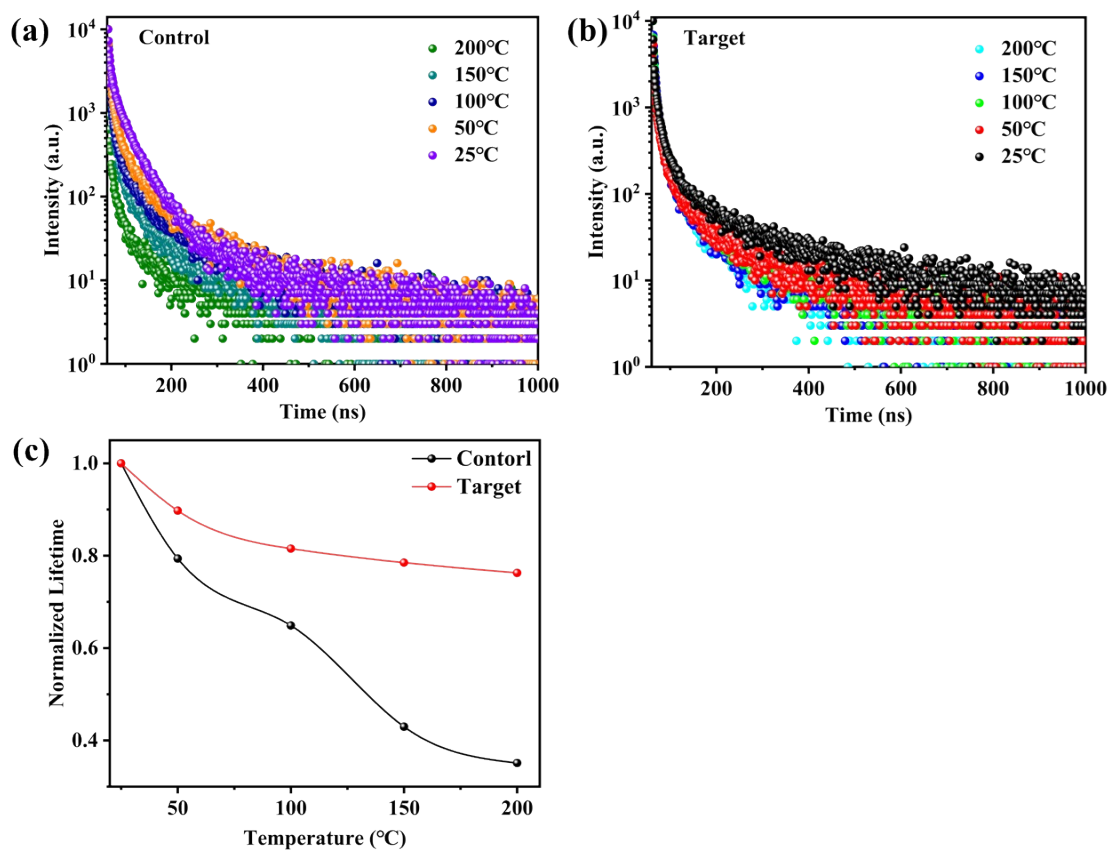

**Figure S17.** (a,b)TRPL spectra of perovskite films at different temperatures. (c) Trend diagram of the normalized TRPL lifetime.

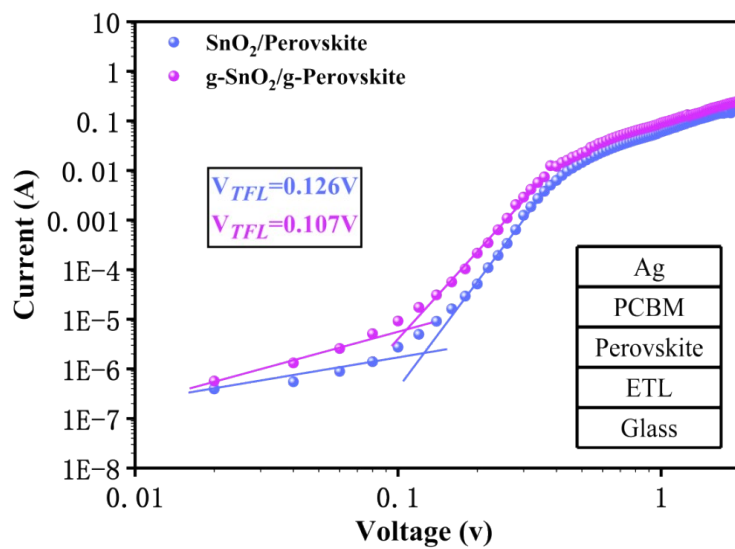

**Figure S18.** Different  $I-V$  curves of electron-only devices in dark, including  $\text{SnO}_2/\text{perovskite}$  and  $\text{g-SnO}_2/\text{g-perovskite}$ .

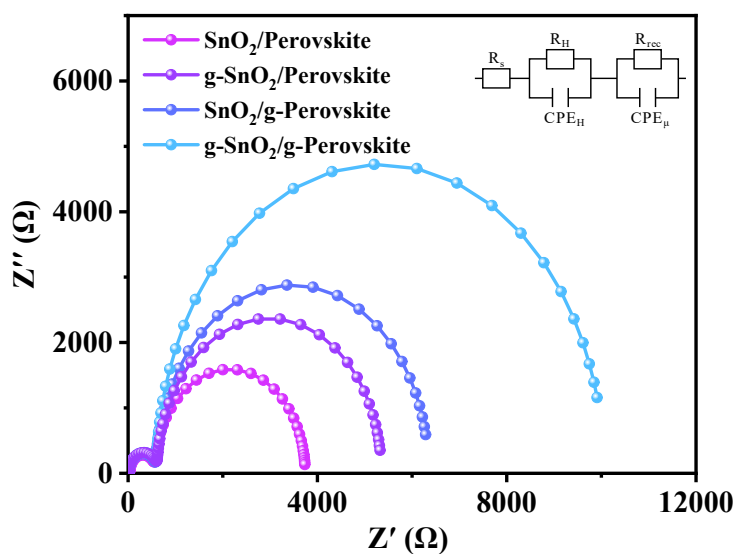

**Figure S19.** Nyquist plots of the PSCs were measured at 0.3 V in the dark, ranging from  $10^6$  to 10 Hz, including SnO<sub>2</sub>/Perovskite, g-SnO<sub>2</sub>/Perovskite, SnO<sub>2</sub>/g-Perovskite, and g-SnO<sub>2</sub>/g-Perovskite.

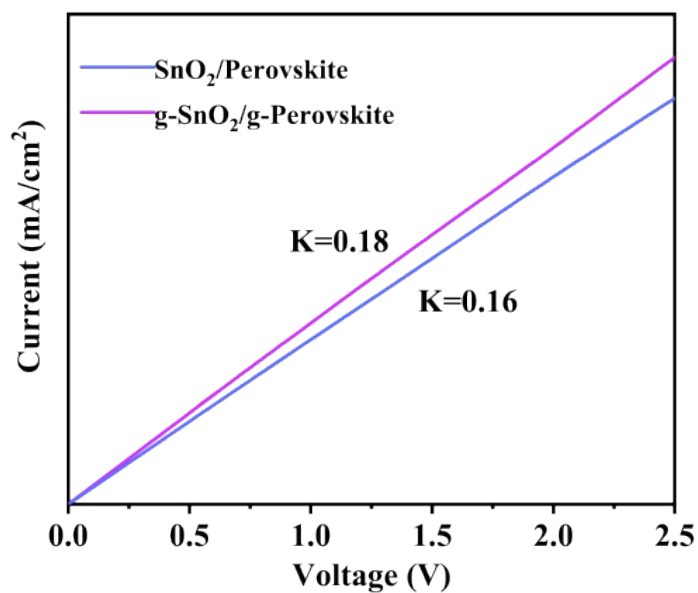

**Figure S20.** The conductivity measurement of SnO<sub>2</sub>/perovskite and g-SnO<sub>2</sub>/g-perovskite by using the space-charge-limited current (SCLC) model with a device structure of ITO/ETL/perovskite/Ag.

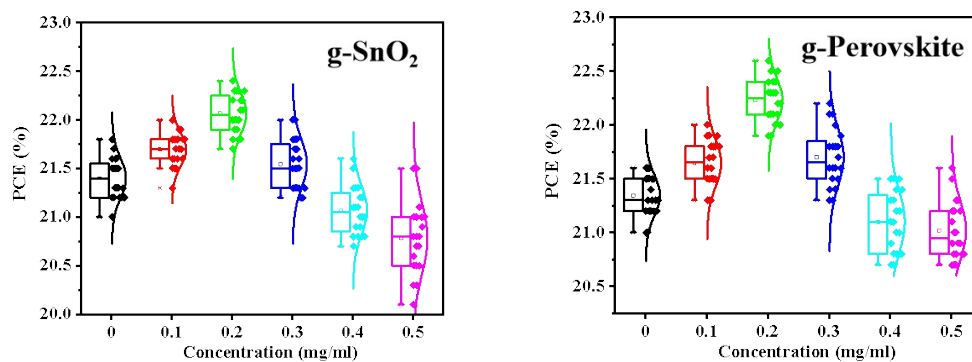

**Figure S21.** Histogram of devices with various g-C<sub>3</sub>N<sub>4</sub> concentrations (0.1-0.5 mg/ml), respectively and histogram of devices with various g-C<sub>3</sub>N<sub>4</sub> concentrations (0.1-0.5 mg/ml), respectively.

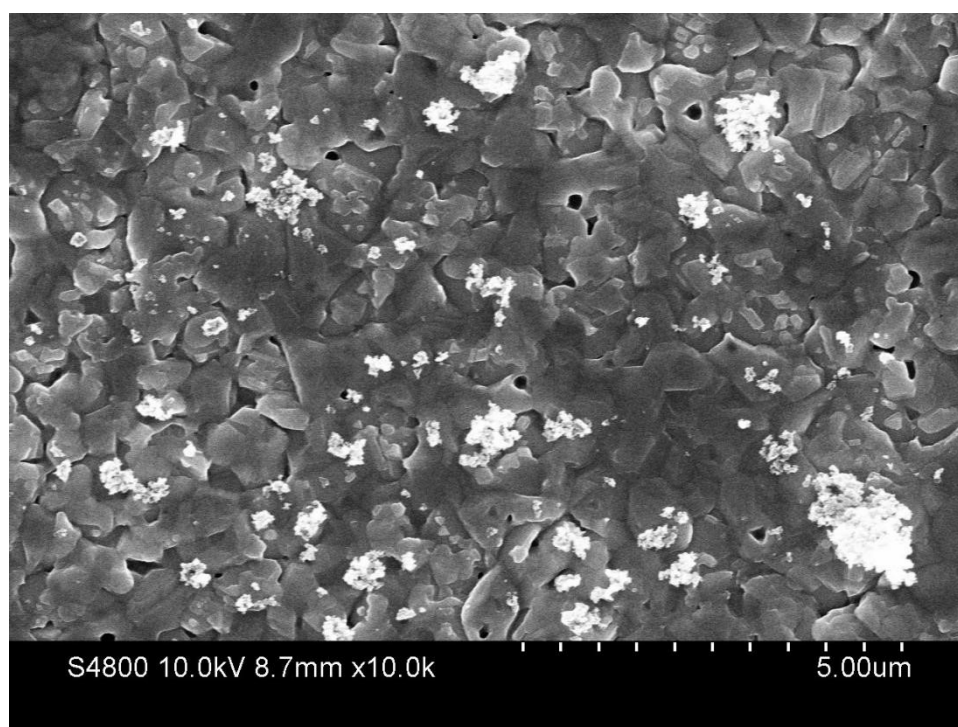

**Figure S22.** SEM images of the perovskite film with 5 mg/ml g-C<sub>3</sub>N<sub>4</sub>.



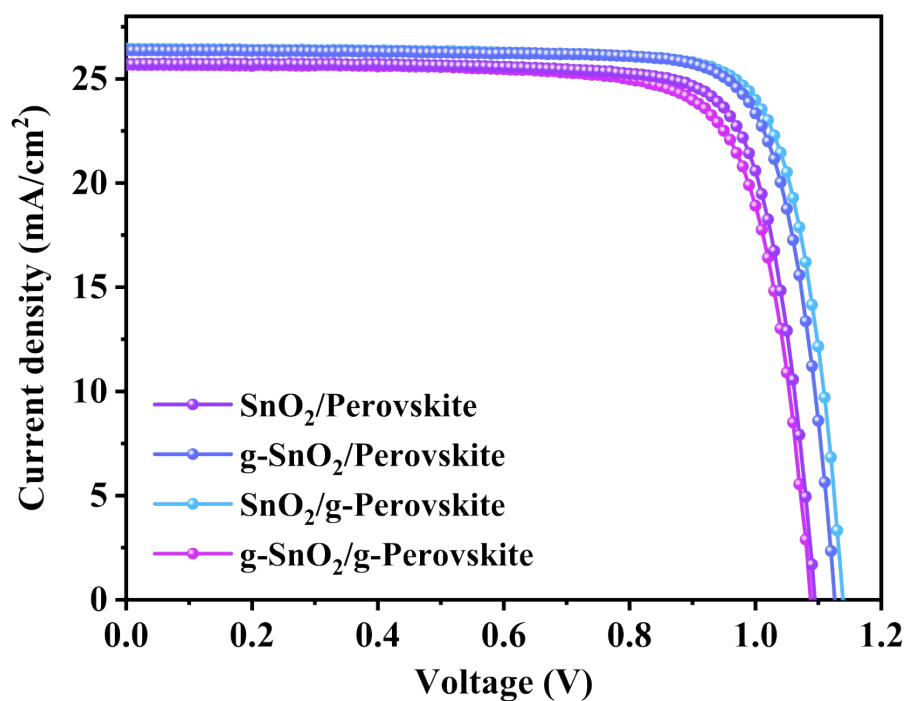

**Figure S23.** Optimized  $J-V$  curves of the PSCs, including including  $\text{SnO}_2/\text{Perovskite}$ ,  $\text{g-SnO}_2/\text{Perovskite}$ ,  $\text{SnO}_2/\text{g-Perovskite}$ , and  $\text{g-SnO}_2/\text{g-Perovskite}$ .

**Figure S24.** EQE spectra with the integrated  $J_{sc}$  of the control and target devices.

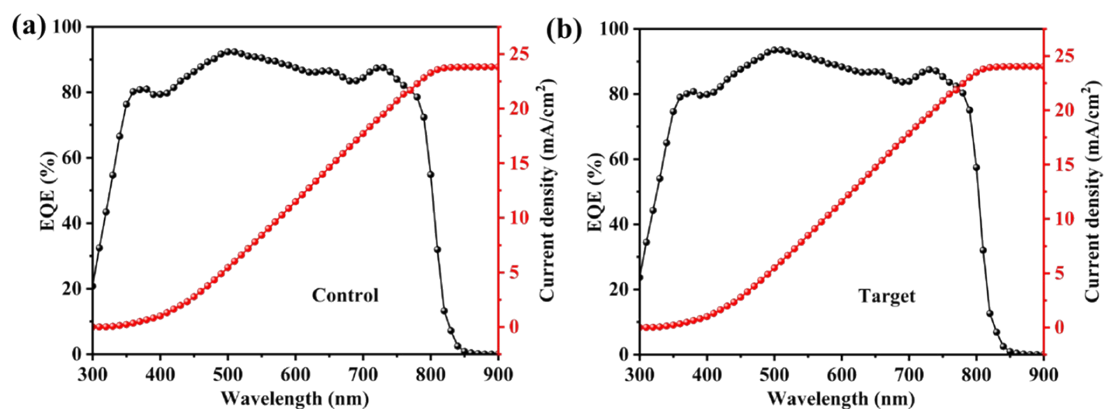

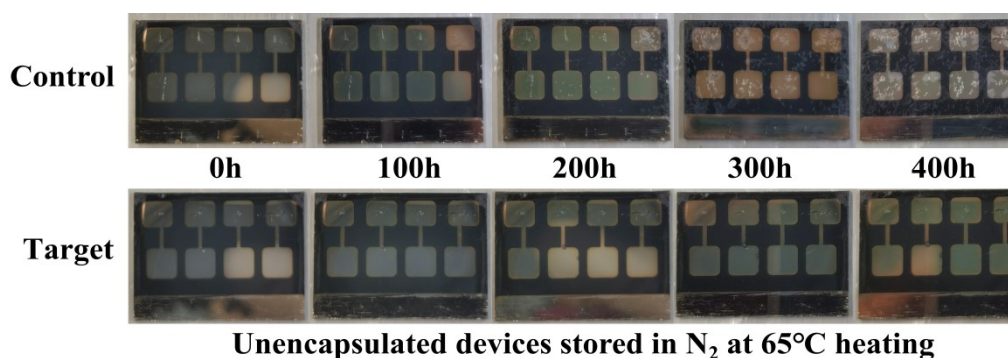

**Figure S25.** Temperature-dependent thermal stability of time for unencapsulated devices stored in N<sub>2</sub> at 65°C heating.

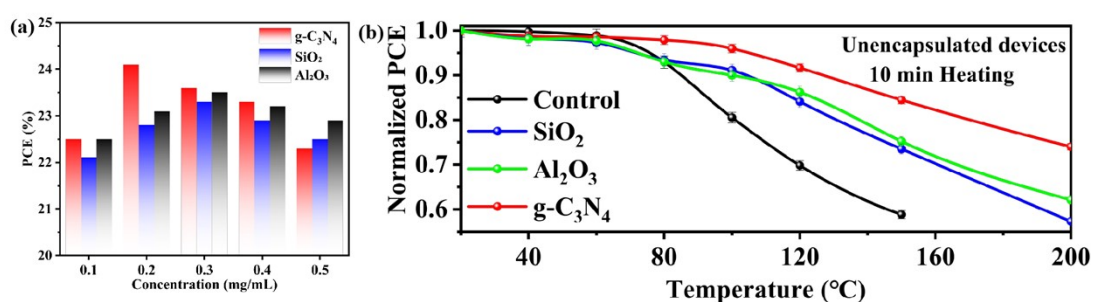

**Figure S26.** (a) Trend diagram of the PCE of PSCs based on different concentrations of additives, including g-C<sub>3</sub>N<sub>4</sub>, Al<sub>2</sub>O<sub>3</sub> and SiO<sub>2</sub>. (b) Normalized PCE for unencapsulated devices heated at different temperatures for 10 min including control, g-C<sub>3</sub>N<sub>4</sub>, Al<sub>2</sub>O<sub>3</sub> and SiO<sub>2</sub>.

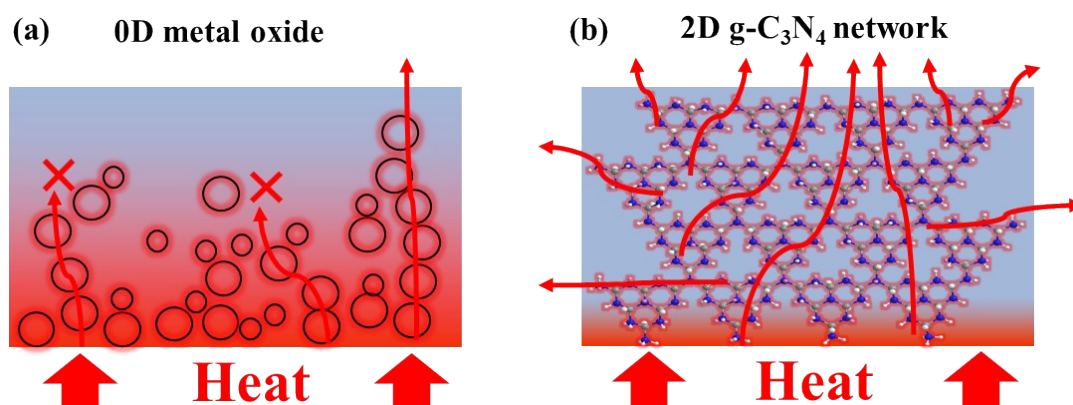

**Figure S27.** (a) Thermal transferring path diagram formed by a one-dimensional material Al<sub>2</sub>O<sub>3</sub> and SiO<sub>2</sub>, and (b) the 3D thermal conduction path formed by g-C<sub>3</sub>N<sub>4</sub>.

**Table S1.** Fitted results of TRPL curves of the Control and Target films.

| Samples | $\tau_1$ (ns) | $\tau_2$ (ns) | $\tau_{avg}$ (ns) |
|---------|---------------|---------------|-------------------|
| Control | 28.03         | 137.93        | 103.41            |
| Target  | 22.93         | 197.83        | 122.34            |

**Table S2.** EIS Parameters for the PSCs Based on the Control and Target.

| Samples | $R_s$ ( $\Omega$ ) | $R_{rec}$ ( $\Omega$ ) |
|---------|--------------------|------------------------|
| Control | 31.85              | 3177                   |
| Target  | 13.81              | 9448                   |

**Table S3.** Recent development of g-C<sub>3</sub>N<sub>4</sub> based PSCs photovoltaic performance.

| Structure                                                                                                                               | PCE (%) | Voc (V) | Jsc(mA $\cdot$ cm <sup>-2</sup> ) | FF (%) | Ref. |
|-----------------------------------------------------------------------------------------------------------------------------------------|---------|---------|-----------------------------------|--------|------|
| ITO/PTAA/NO <sub>3</sub> -g-C <sub>3</sub> N <sub>4</sub> :CsFAMAPbI <sub>3-x</sub> Br <sub>x</sub> /PCBM/BCP/Ag                        | 20.08   | 1.11    | 22.84                             | 79.20  | [1]  |
| FTO/c-TiO <sub>2</sub> /g-C <sub>3</sub> N <sub>4</sub> :MAPbI <sub>3</sub> /spiro-OMeTAD /MoO <sub>3</sub> /Ag                         | 19.49   | 1.07    | 24.31                             | 74.0   | [2]  |
| FTO/c-TiO <sub>2</sub> /g-C <sub>3</sub> N <sub>4</sub> :MAPbI <sub>3</sub> /spiro-OMeTAD /Au                                           | 21.10   | 1.16    | 23.00                             | 79.0   | [3]  |
| FTO/c-TiO <sub>2</sub> /m-TiO <sub>2</sub> /g-C <sub>3</sub> N <sub>4</sub> :CsPbBr <sub>3</sub> /carbon                                | 8.00    | 1.277   | 7.80                              | 80.32  | [4]  |
| FTO/c-TiO <sub>2</sub> /m-TiO <sub>2</sub> /Al <sub>2</sub> O <sub>3</sub> /g-C <sub>3</sub> N <sub>4</sub> :MAPbI <sub>3</sub> /carbon | 14.34   | 1.00    | 23.80                             | 60.1   | [5]  |
| PDMS/hc-PEDOT:PSS/PEDOT:PSS/g-C <sub>3</sub> N <sub>4</sub> :FASnI <sub>3</sub> /C60/BCP/Ag                                             | 8.56    | 0.621   | 20.68                             | 66.68  | [6]  |
| FTO/TiO <sub>2</sub> /G-CNI:CsFAMAPbI <sub>3-x</sub> Br <sub>x</sub> /spiro-OMeTAD/Au                                                   | 18.28   | 1.07    | 22.97                             | 74.0   | [7]  |
| FTO/c-TiO <sub>2</sub> /U-g-C <sub>3</sub> N <sub>4</sub> :MAPbI <sub>3</sub> /spiro-OMeTAD/Au                                          | 15.80   | 1.10    | 23.20                             | 62.0   | [8]  |
| ITO/CNQDs:SnO <sub>2</sub> /CsFAMAPbI <sub>3-x</sub> Br <sub>x</sub> /Spiro-OMeTAD/Au                                                   | 22.13   | 1.18    | 24.03                             | 78.3   | [9]  |
| FTO/SnO <sub>2</sub> /CNQDs/(FA/MA/Cs)PbI <sub>3-(x+y)</sub> Br <sub>x</sub> Cl <sub>y</sub> /spiro-OMeTAD/Au                           | 21.23   | 1.14    | 23.39                             | 79.6   | [10] |
| FTO/SnO <sub>2</sub> /g-C <sub>3</sub> N <sub>4</sub> /MAPbI <sub>3</sub> /g-C <sub>3</sub> N <sub>4</sub> /Spiro-OMeTAD/Au             | 19.67   | 1.14    | 21.45                             | 80.7   | [11] |

|                                                                                                                                                                                            |       |      |       |       |            |
|--------------------------------------------------------------------------------------------------------------------------------------------------------------------------------------------|-------|------|-------|-------|------------|
| FTO/c-TiO <sub>2</sub> /m-TiO <sub>2</sub> /g-C <sub>3</sub> N <sub>4</sub> nanosheets/MAPbI <sub>3</sub> / Carbon                                                                         | 11.37 | 1.02 | 16.91 | 66    | [12]       |
| FTO/c-TiO <sub>2</sub> /g-C <sub>3</sub> N <sub>4</sub> /MAPbI <sub>3</sub> /spiro-OMeTAD/Ag                                                                                               | 19.55 | 1.11 | 23.69 | 74.0  | [13]       |
| ITO/g-C <sub>3</sub> N <sub>4</sub> :SnO <sub>2</sub> /FA <sub>0.85</sub> MA <sub>0.11</sub> Cs <sub>0.04</sub> PbI <sub>2.67</sub> Br <sub>0.33-x</sub> PbI <sub>2</sub> /spiro-OMeTAD/Au | 21.54 | 1.19 | 23.21 | 78    | [14]       |
| ITO/PTAA/MAPbI <sub>3</sub> /PC <sub>60</sub> BM/CMB-vTA/AZO/Ag                                                                                                                            | 17.15 | 1.09 | 20.17 | 78.03 | [15]       |
| FTO/TiO <sub>2</sub> /thiazole-C <sub>3</sub> N <sub>4</sub> /(FAPbI <sub>3</sub> ) <sub>0.875</sub> (CsPbBr <sub>3</sub> ) <sub>0.125</sub> /spiro-OMeTAD/Ag                              | 19.23 | 1.11 | 22.50 | 77    | [16]       |
| FTO/TiO <sub>2</sub> /w-CN/CsPbIBr <sub>2</sub> /w-CN/Carbon                                                                                                                               | 10.1  | 1.36 | 11.19 | 66.39 | [17]       |
| ITO/PEDOT:PSS/g-C <sub>3</sub> N <sub>4</sub> QDs:CsFAMAPbI <sub>3-x</sub> Br <sub>x</sub> /PCBM/Ag                                                                                        | 20.02 | 0.99 | 25.93 | 78    | [18]       |
| FTO/ZnO/TiO <sub>2</sub> /g-C <sub>3</sub> N <sub>4</sub> /MAPbI <sub>3</sub> / Spiro-OMeTAD                                                                                               | 20.57 | 1.11 | 24.03 | 77    | [19]       |
| ITO/g-C <sub>3</sub> N <sub>4</sub> :SnO <sub>2</sub> /FA <sub>0.93</sub> MA <sub>0.07</sub> PbI <sub>3</sub> :g-C <sub>3</sub> N <sub>4</sub> /spiro-OMeTAD/Ag                            | 24.19 | 1.14 | 26.45 | 80.27 | This study |

## References

- [1] Li, Z.; Wu, S.; Zhang, J.; Yuan, Y.; Wang, Z.; Zhu, Z. Improving photovoltaic performance using perovskite/surface-modified graphitic carbon nitride heterojunction. *Sol. RRL* **2020**, *4* (3), 1900413.
- [2] Jiang, L. L.; Wang, Z. K.; Li, M.; Zhang, C. C.; Ye, Q. Q.; Hu, K. H.; Lu, D. Z.; Fang, P. F.; Liao, L. S. Passivated perovskite crystallization via g-C<sub>3</sub>N<sub>4</sub> for high-performance solar cells. *Adv. Funct. Mater.* **2018**, *28* (7), 1705875.
- [3] Liao, J.-F.; Wu, W.-Q.; Zhong, J.-X.; Jiang, Y.; Wang, L.; Kuang, D.-B. Enhanced efficacy of defect passivation and charge extraction for efficient perovskite photovoltaics with a small open circuit voltage loss. *J. Mater. Chem. A* **2019**, *7* (15), 9025-9033.
- [4] Liu, W.-W.; Liu, Y.-C.; Cui, C.-Y.; Niu, S.-T.; Niu, W.-J.; Liu, M.-C.; Liu, M.-J.; Gu, B.; Zhang, L.-Y.; Zhao, K. All-inorganic CsPbBr<sub>3</sub> perovskite solar cells with

enhanced efficiency by exploiting lone pair electrons via passivation of crystal boundary using carbon nitride (g-C<sub>3</sub>N<sub>4</sub>) nanosheets. *Mater. Today Energy* **2021**, *21*, 100782.

[5] Yang, Z.-L.; Zhang, Z.-Y.; Fan, W.-L.; Hu, C.-s.; Zhang, L.; Qi, J.-J. High-performance g-C<sub>3</sub>N<sub>4</sub> added carbon-based perovskite solar cells insulated by Al<sub>2</sub>O<sub>3</sub> layer. *Sol. Energy* **2019**, *193*, 859-865.

[6] Rao, L.; Meng, X.; Xiao, S.; Xing, Z.; Fu, Q.; Wang, H.; Gong, C.; Hu, T.; Hu, X.; Guo, R. Wearable tin-based perovskite solar cells achieved by a crystallographic size effect. *Angew. Chem. Int. Ed. Engl.* **2021**, *133* (26), 14814-14821.

[7] Cao, W.; Lin, K.; Li, J.; Qiu, L.; Dong, Y.; Wang, J.; Xia, D.; Fan, R.; Yang, Y. Iodine-doped graphite carbon nitride for enhancing photovoltaic device performance via passivation trap states of triple cation perovskite films. *J. Mater. Chem. C* **2019**, *7* (40), 12717-12724.

[8] Wei, X.; Liu, X.; Liu, H.; Yang, S.; Zeng, H.; Meng, F.; Lei, X.; Liu, J. Exfoliated graphitic carbon nitride self-recognizing CH<sub>3</sub>NH<sub>3</sub>PbI<sub>3</sub> grain boundaries by hydrogen bonding interaction for improved perovskite solar cells. *Sol. Energy* **2019**, *181*, 161-168.

[9] Chen, J.; Dong, H.; Zhang, L.; Li, J.; Jia, F.; Jiao, B.; Xu, J.; Hou, X.; Liu, J.; Wu, Z. Graphitic carbon nitride doped SnO<sub>2</sub> enabling efficient perovskite solar cells with PCEs exceeding 22%. *J. Mater. Chem. A* **2020**, *8* (5), 2644-2653.

[10] Liu, P.; Sun, Y.; Wang, S.; Zhang, H.; Gong, Y.; Li, F.; Shi, Y.; Du, Y.; Li, X.; Guo, S.-S. Two dimensional graphitic carbon nitride quantum dots modified perovskite solar cells and photodetectors with high performances. *J. Power Sources* **2020**, *451*, 227825.

[11] Liu, Z.; Wu, S.; Yang, X.; Zhou, Y.; Jin, J.; Sun, J.; Zhao, L.; Wang, S. The dual interfacial modification of 2D g-C<sub>3</sub>N<sub>4</sub> for high-efficiency and stable planar perovskite solar cells. *Nanoscale Adv.* **2020**, *2* (11), 5396-5402.

- [12] Jin, J.; Wu, S.; Yang, X.; Zhou, Y.; Li, Z.; Cao, Q.; Chi, B.; Li, J.; Zhao, L.; Wang, S. Improve the efficiency of perovskite solar cells through the interface modification of g-C<sub>3</sub>N<sub>4</sub> nanosheets. *Mater. Lett.* **2021**, *304*, 130685.
- [13] Yang, J.; Chu, L.; Hu, R.; Liu, W.; Liu, N.; Ma, Y.; Ahmad, W.; Li, X. a. Work function engineering to enhance open-circuit voltage in planar perovskite solar cells by g-C<sub>3</sub>N<sub>4</sub> nanosheets. *Nano Res.* **2021**, *14*, 2139-2144.
- [14] Yang, X.; Li, L.; Wu, J.; Hu, Q.; Wang, Y.; Russell, T. P.; Tu, Y.; Zhu, R. Optimizing vertical crystallization for efficient perovskite solar cells by buried composite layers. *Sol. RRL* **2021**, *5* (10), 2100457.
- [15] Wang, L.; Fu, L.; Li, B.; Li, H.; Pan, L.; Chang, B.; Yin, L. Thiazole-Modified C<sub>3</sub>N<sub>4</sub> Interfacial Layer for Defect Passivation and Charge Transport Promotion in Perovskite Solar Cells. *Sol. RRL* **2021**, *5* (3), 2000720.
- [16] Cruz, D.; Garcia Cerrillo, J.; Kumru, B.; Li, N.; Dario Perea, J.; Schmidt, B. V.; Lauermann, I.; Brabec, C. J.; Antonietti, M. Influence of thiazole-modified carbon nitride nanosheets with feasible electronic properties on inverted perovskite solar cells. *J. Am. Chem. Soc.* **2019**, *141* (31), 12322-12328.
- [17] Shi, L.; Yuan, H.; Zhang, Y.; Sun, X.; Duan, L.; Li, Q.; Huang, Z.; Ban, X.; Zhang, D. Novel C<sub>3</sub>N<sub>4</sub>-assisted bilateral interface engineering for efficient and stable perovskite solar cells. *Langmuir* **2022**, *38* (40), 12390-12398.
- [18] Jiang, L.-L.; Chen, M.-M.; Tang, X.-D.; Tang, Y.; Li, S.-J.; Li, Y.; Li, H.-H.; Liu, H.-R. Reduced electron relaxation time of perovskite films via g-C<sub>3</sub>N<sub>4</sub> quantum dot doping for high-performance perovskite solar cells. *RSC advances* **2023**, *13* (25), 16935-16942.
- [19] Gkini, K.; Martinaiou, I.; Botzakaki, M.; Tsipas, P.; Theofylaktos, L.; Dimoulas, A.; Katsaros, F.; Stergiopoulos, T.; Krontiras, C.; Georga, S. Energy band tuning induced by g-C<sub>3</sub>N<sub>4</sub> interface engineering for efficient and stable perovskite solar cells. *Mater. Today Commun.* **2022**, *32*, 103899.
